# Supplementary material for: The economic burden of diabetes to French national health insurance: a new cost-of-illness method based on a combined medicalized and incremental approach
Source: PubMed Central journal article supplement (PMC5813074; doi:10.1007/s10198-017-0873-y), 2017-02-11
Supplement: 10198_2017_873_MOESM1_ESM.pdf [file 10198_2017_873_MOESM1_ESM.pdf]

## Appendix 1: Estimated impact of diabetes on health care expenditure, a regression based approach

### Model Information

|                             |          |
|-----------------------------|----------|
| Distribution                | Gamma    |
| Link Function               | Log      |
| Number of Observations Used | 58737502 |

### Criteria For Assessing Goodness Of Fit

| Criterion          | DF   | Value        | Value/DF |
|--------------------|------|--------------|----------|
| Deviance           | 59E6 | 163907561.07 | 2.7905   |
| Scaled Deviance    | 59E6 | 75570613.497 | 1.2866   |
| Pearson Chi-Square | 59E6 | 1603485595.1 | 27.2992  |
| Scaled Pearson X2  | 59E6 | 739297134.06 | 12.5865  |

### Analysis Of Maximum Likelihood Parameter Estimates

| Parameter               | Estimate | Standard Error | Wald 95%          |         | Pr > ChiSq |
|-------------------------|----------|----------------|-------------------|---------|------------|
|                         |          |                | Confidence Limits |         |            |
| Intercept               | 7.2931   | 0.0011         | 7.2910            | 7.2952  | <.0001     |
| 10 to 19 years old      | -0.1450  | 0.0007         | -0.1465           | -0.1435 | <.0001     |
| 20 to 29 years old      | 0.5268   | 0.0007         | 0.5253            | 0.5282  | <.0001     |
| 30 to 39 years old      | 0.9422   | 0.0008         | 0.9408            | 0.9437  | <.0001     |
| 40 to 49 years old      | 1.0470   | 0.0007         | 1.0455            | 1.0484  | <.0001     |
| 50 to 59 years old      | 1.4287   | 0.0008         | 1.4272            | 1.4301  | <.0001     |
| 60 to 69 years old      | 1.3935   | 0.0008         | 1.3920            | 1.3951  | <.0001     |
| 70 to 79 years old      | 1.7057   | 0.0009         | 1.7038            | 1.7075  | <.0001     |
| 80 years old and older  | 2.0886   | 0.0010         | 2.0867            | 2.0906  | <.0001     |
| Less than 10 years old  | 0.0000   | 0.0000         | 0.0000            | 0.0000  | .          |
| Women                   | 0.0149   | 0.0004         | 0.0141            | 0.0156  | <.0001     |
| Men                     | 0.0000   | 0.0000         | 0.0000            | 0.0000  | .          |
| People without diabetes | -0.7932  | 0.0009         | -0.7950           | -0.7914 | <.0001     |

|                      |        |        |        |        |   |
|----------------------|--------|--------|--------|--------|---|
| People with diabetes | 0.0000 | 0.0000 | 0.0000 | 0.0000 | . |
|----------------------|--------|--------|--------|--------|---|

---

---

Note: The scale parameter was estimated by maximum likelihood.

Source: CNAMTS/SNIIRAM-2012
